# Supplementary material
Source: PubMed Central journal article supplement (PMC2963084)
Supplement: NIHMS241668-supplement-1_si_001.pdf [file NIHMS241668-supplement-1_si_001.pdf]

## **Supporting Information**

### **Reaction Pathway and Free Energy Profile for Pre-Chemical Reaction Step of Human Butyrylcholinesterase-Catalyzed Hydrolysis of (-)-Cocaine by Combined Targeted Molecular Dynamics and Potential of Mean Force Simulations**

Xiaoqin Huang, Yongmei Pan, Fang Zheng, and Chang-Guo Zhan\*

Department of Pharmaceutical Sciences, College of Pharmacy, University of Kentucky,  
789 S. Limestone, Lexington, Kentucky 40536

**Running title:** Pre-chemical reaction step of (-)-cocaine in BChE

#### **Correspondence:**

Chang-Guo Zhan, Ph.D.

Professor

Department of Pharmaceutical Sciences

College of Pharmacy

University of Kentucky

725 Rose Street

Lexington, KY 40536

TEL: 859-323-3943

FAX: 859-323-3575

E-mail: [zhan@uky.edu](mailto:zhan@uky.edu)

**Supporting Information Available.** Two figures for the results of MD simulations on the binding structures of (-)-cocaine binding with both wild-type BChE and A328W/Y332G mutant; one figure for the tracked residue-based contacts of A328W/Y332G BChE with (-)-cocaine along the reaction coordinate; two tables about the number and fraction of calculated residue-based contacts between (-)-cocaine and BChE. This material is available free of charge via the Internet <http://pubs.acs.org>.

---

\* Corresponding author. E-mail: [zhan@uky.edu](mailto:zhan@uky.edu)

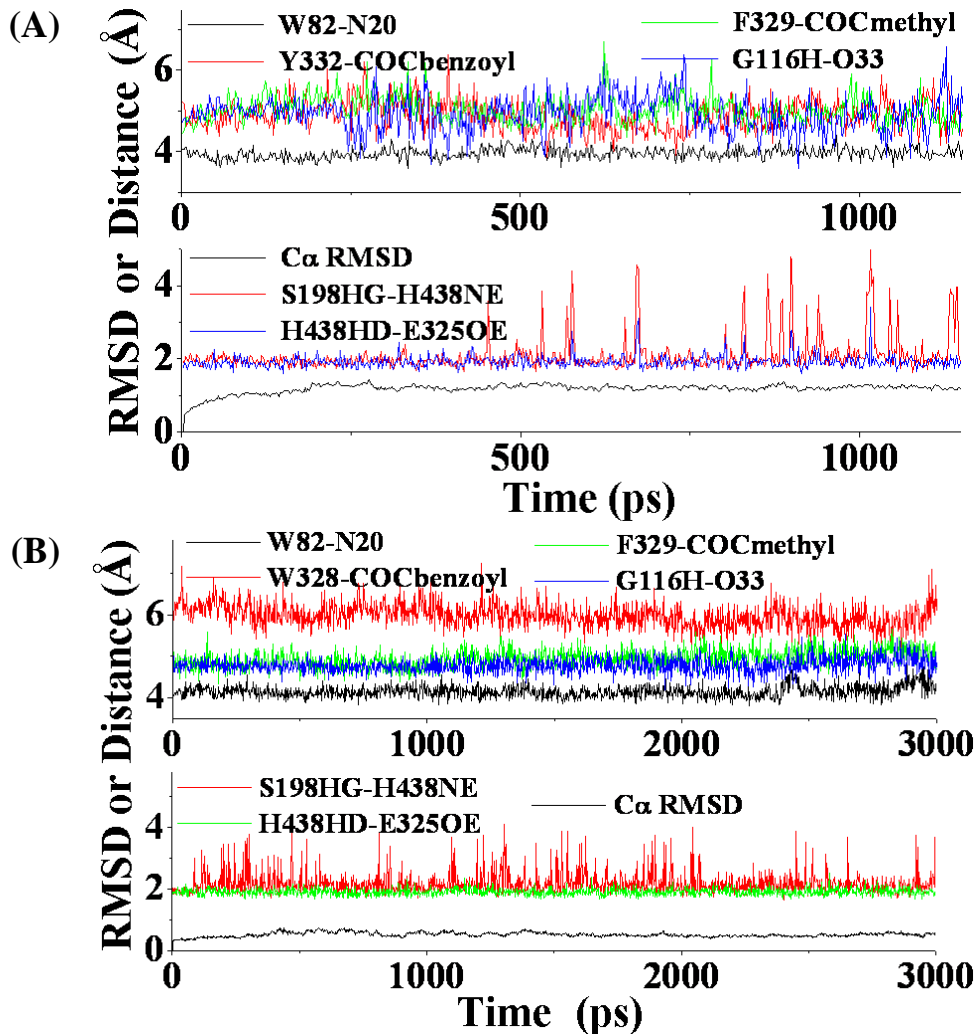

**Figure S1.** (A) Plots of C $\alpha$  RMSDs and key distances tracked through MD simulation on the nonpreactive complex for wild-type BChE(-)-cocaine binding. W82-N20 represents the distance from the center of aromatic side chain of W82 to the nitrogen atom at the cationic head of (-)-cocaine; Y332-COCbenzoyl means the distance from the center of aromatic side chain of Y332 to the center of benzoyl group of (-)-cocaine; F329-COCmethyl represents the distance from the center of aromatic side chain of F329 to the center of methyl ester group of (-)-cocaine; G116H-O33 represents the distance between the backbone hydrogen of residue G116 to the carbonyl oxygen at the benzoyl ester of (-)-cocaine, and similar meaning for distance as G117H-O33; S198HG-H438NE and H438HD-E325OE represent the hydrogen bonding distances within the catalytic triad residues S198-H438-E325 of the enzyme. (B) Tracked changes for C $\alpha$  RMSDs and key

distances from MD simulation on the nonprereactive complex for A328W/Y332G BChE-(-)-cocaine binding. Similarly, W328-COCbenzoyl means the distance from the center of aromatic side chain of W328 to the center of benzoyl group of (-)-cocaine.

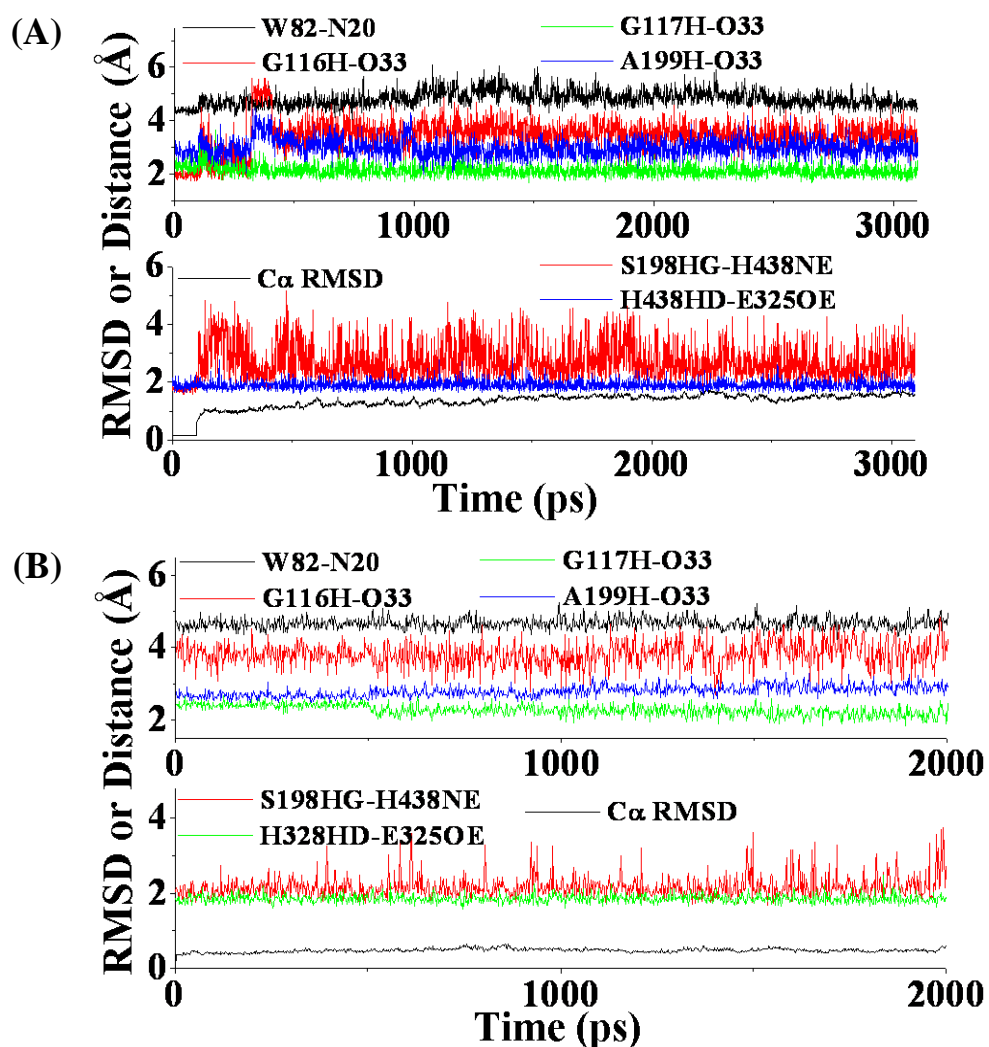

**Figure S2.** Plots of C $\alpha$  RMSDs and key distances tracked through MD simulation on the prereactive complex for wild-type BChE-(-)-cocaine binding structure (A) and A328W/Y332G BChE-(-)-cocaine binding structure (B). W82-N20 represents the distance from the center of aromatic side chain of W82 to the nitrogen atom at the cationic head of (-)-cocaine; G116H-O33 represents the distance between the backbone hydrogen of residue G116 to the carbonyl oxygen at the benzoyl ester of (-)-cocaine, and similar meaning for distances as G117H-O33 and A199H-O33, respectively; S198HG-

H438NE and H438HD-E325OE represent the hydrogen bonding distances within the catalytic triad residues S198-H438-E325 of the enzyme.

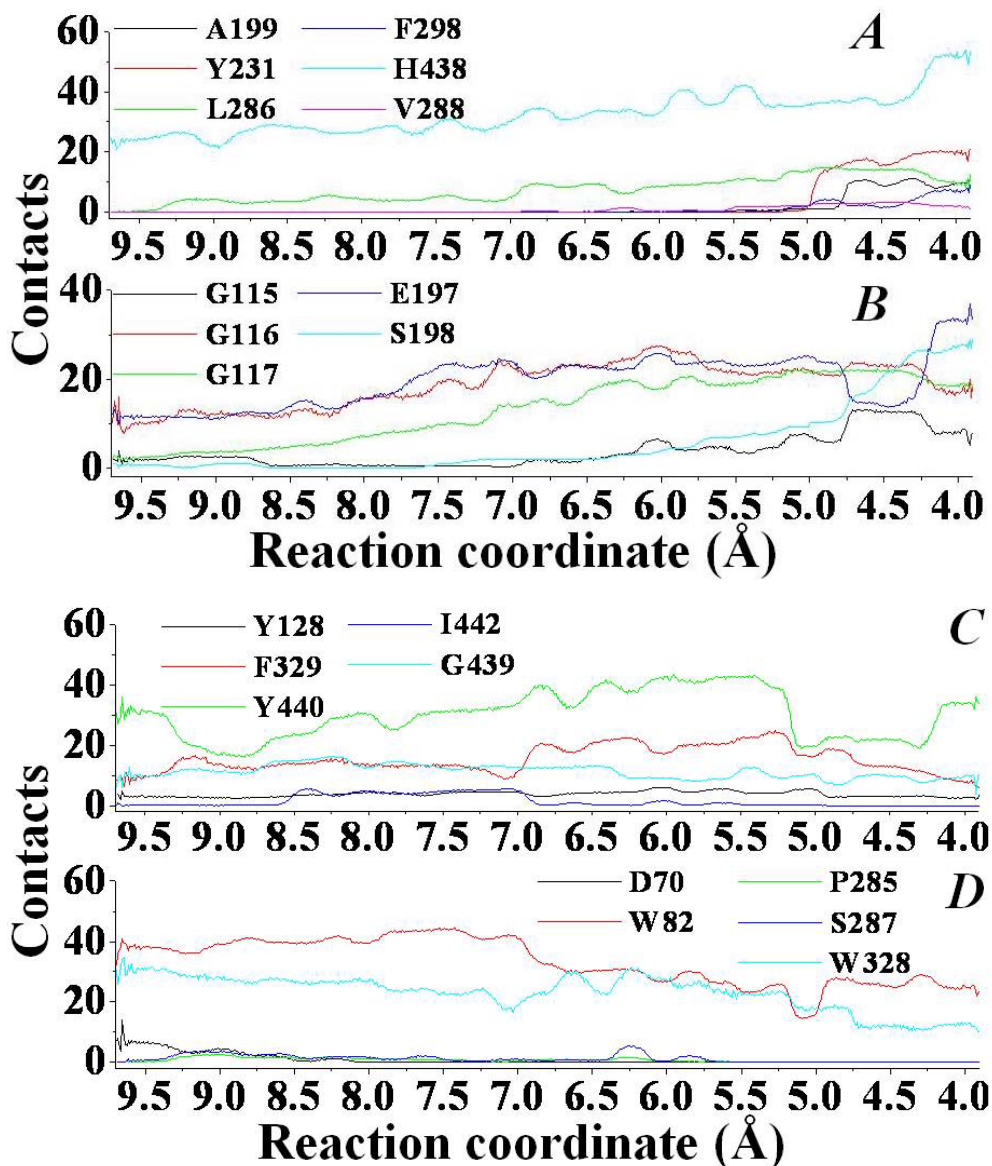

**Figure S3.** Plots for residue-based contacts of A328W/Y332G mutant interacting with (-)-cocaine along the reaction coordinate (*i.e.* the distance from the mass center of the benzoyl group of (-)-cocaine to the mass center of the side chain of residue S198 of the enzyme). (A) and (B): Type I residues showing significant increase in the number of contacts. (C) Type II residues with continuous contacts, and (D) type III residues with decreased number of contacts.

**Table S1. Residues of Wild-type BChE Having Contacts with (-)-Cocaine along the TMD Simulations (Distance Cutoff=5.0Å, Fraction Cutoff=0.080)**

| Residue | Contacts <sup>a</sup> | Fraction <sup>b</sup> | Features*   |
|---------|-----------------------|-----------------------|-------------|
| W82     | 30.73                 | 1.00                  | C decreased |
| G116    | 20.73                 | 1.00                  | C increased |
| G117    | 15.08                 | 1.00                  | C increased |
| E197    | 21.29                 | 1.00                  | C increased |
| L286    | 10.03                 | 1.00                  | C to C      |
| F329    | 24.24                 | 1.00                  | C to C      |
| H438    | 34.59                 | 1.00                  | C increased |
| Y440    | 30.25                 | 1.00                  | C to C      |
| G439    | 7.96                  | 1.00                  | C to C      |
| S198    | 7.46                  | 0.98                  | C increased |
| Y128    | 2.61                  | 0.97                  | C to C      |
| G115    | 4.26                  | 0.90                  | C increased |
| A328    | 5.03                  | 0.82                  | C decreased |
| V288    | 1.91                  | 0.64                  | C increased |
| A199    | 0.96                  | 0.46                  | C increased |
| Y332    | 6.39                  | 0.45                  | C decreased |
| F398    | 2.34                  | 0.42                  | C increased |
| W231    | 5.91                  | 0.41                  | C increased |
| P285    | 1.25                  | 0.41                  | C decreased |
| S287    | 1.81                  | 0.41                  | C decreased |
| T120    | 0.34                  | 0.21                  | C decreased |
| I442    | 0.53                  | 0.19                  | C to C      |
| D70     | 0.62                  | 0.18                  | C decreased |
| S224    | 0.27                  | 0.16                  | C increased |
| M437    | 0.52                  | 0.13                  | C to C      |

<sup>a</sup> Average number of contacts over the entire TMD trajectory. <sup>b</sup> Fraction of time in which at least one contact was formed during the TMD simulation. \* C: contacted; C to C: contacted continuously.

**Table S2. Residues of the A328W/Y332G mutant having contacts with (-)-Cocaine during the TMD simulations (distance cutoff=5.0 Å, fraction cutoff=0.080)**

| <b>Residue</b> | <b>Contacts<sup>a</sup></b> | <b>Fraction<sup>b</sup></b> | <b>Features*</b> |
|----------------|-----------------------------|-----------------------------|------------------|
| W82            | 30.02                       | 1.00                        | C decreased      |
| G116           | 18.74                       | 1.00                        | C increased      |
| G117           | 14.60                       | 0.98                        | C increased      |
| Y128           | 3.62                        | 0.99                        | C to C           |
| E197           | 19.87                       | 1.00                        | C increased      |
| L286           | 8.40                        | 0.99                        | C increased      |
| W328           | 22.51                       | 1.00                        | C decreased      |
| F329           | 17.59                       | 1.00                        | C to C           |
| H438           | 34.62                       | 1.00                        | C increased      |
| G439           | 10.47                       | 1.00                        | C to C           |
| Y440           | 28.32                       | 0.99                        | C to C           |
| G115           | 3.92                        | 0.79                        | C increased      |
| S198           | 6.27                        | 0.78                        | C increased      |
| V288           | 0.87                        | 0.42                        | C increased      |
| I442           | 1.44                        | 0.41                        | C to C           |
| P285           | 0.70                        | 0.39                        | C decreased      |
| A199           | 1.24                        | 0.37                        | C increased      |
| S287           | 1.14                        | 0.31                        | C decreased      |
| F398           | 1.03                        | 0.28                        | C increased      |
| D70            | 1.11                        | 0.20                        | C decreased      |
| W231           | 2.63                        | 0.18                        | C increased      |

<sup>a</sup> Average number of contacts over the entire TMD trajectory. <sup>b</sup> Fraction of time in which at least one contact was formed during the TMD simulation. \* C: contacted; C to C: contacted continuously.
